# Supplementary material for: Mechanistic insight into the influence of O2 on N2O formation in the selective catalytic reduction of NO with NH3 over Pd/CeO2 catalyst
Source: Royal Society of Chemistry journal article supplement (doi:10.1039/d0cy02325f), 2021-01-01
Supplement: d0cy02325f1.pdf [file d0cy02325f1.pdf]

## Supporting Information

### Mechanistic insight into the influence of O<sub>2</sub> on N<sub>2</sub>O formation in selective catalytic reduction of NO with NH<sub>3</sub> over Pd/CeO<sub>2</sub> catalyst

Liping Sheng<sup>1+</sup>, Songda Li<sup>1+</sup>, Zhaoxia Ma<sup>1,4\*</sup>, Fei Wang<sup>1</sup>, Hu He<sup>1</sup>, Yi Gao<sup>2,3</sup>, Beien Zhu<sup>2,3\*</sup>, Yong Wang<sup>1</sup>, Hangsheng Yang<sup>1\*</sup>

1. State Key Laboratory of Silicon Materials and Center of Electron Microscopy, School of Materials Science and Engineering, Zhejiang University, Hangzhou 310027, China.

2. Division of Interfacial Water and Key Laboratory of Interfacial Physics and Technology, Shanghai Institute of Applied Physics, Chinese Academy of Sciences, Shanghai, 201800 China.

3. Shanghai Advanced Research Institute, Chinese Academy of Sciences, Shanghai, 201210 China.

4. College of Chemistry & Environment Protection Engineering, Southwest Minzu University, Chengdu 610041, China.

+ First authors

\* Corresponding authors, email: 06zxma@zju.edu.cn (ZM), zhubeien@sinap.ac.cn (BZ), and hsyang@zju.edu.cn (HY)

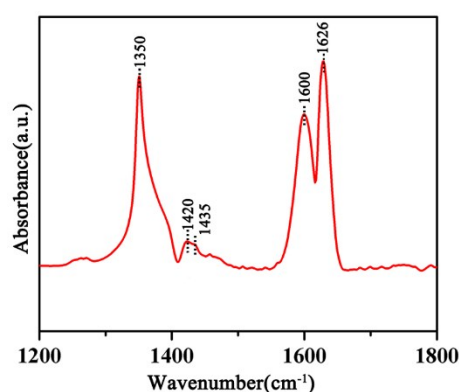

**Fig. S1.** In situ FTIR spectrum after Pd/CeO<sub>2</sub> catalyst exposed to 800 ppm NO and 5 vol% O<sub>2</sub>, Ar balanced at 100 °C. The bands at 1350, 1420 and 1435 cm<sup>-1</sup> are attributed to monodentate nitrites [34]. The bands at 1600 and 1626 cm<sup>-1</sup> are attributed to adsorbed NO<sub>2</sub> [35, 36]. The results indicated that NO<sub>2</sub> could be formed and adsorbed on the catalyst surface at as low as 100 °C during NO oxidation.

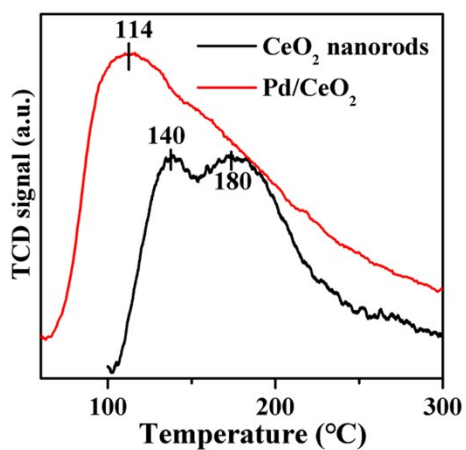

**Fig. S2.** NH<sub>3</sub>-TPD of Pd/CeO<sub>2</sub> catalyst and CeO<sub>2</sub> nanorods. The NH<sub>3</sub> desorption peaks of the two samples were detected below 300 °C, which is ascribed to weakly adsorbed ammonia.

#### Reference

- 34 L. Ma, C. Seo, M. Nahata, X. Chen, J. Li, J. Schwank, *Appl. Catal. B-Environ.*, 2018, **232**, 246–259.
- 35 G.S. Qi, R.T. Yang, *J. Phys. Chem. B.*, 2004, **108**, 15738–15747.
- 36 K.I. Hadjiivanov, *Catal. Rev.-Sci. Eng.* 2000, **42**, 71–144.
